# Supplementary material for: Inducing CCR5Δ32/Δ32 Homozygotes in the Human Jurkat CD4+ Cell Line and Primary CD4+ Cells by CRISPR-Cas9 Genome-Editing Technology
Source: PubMed Central journal article supplement — Mol Ther Nucleic Acids. 2018 Jun 17;12:267–74. doi: 10.1016/j.omtn.2018.05.012 (PMC6005807; doi:10.1016/j.omtn.2018.05.012), 2018-06-17
Supplement: mmc1.pdf [file mmc1.pdf]

OMTN, Volume 12

## **Supplemental Information**

**Inducing CCR5 $\Delta$ 32/ $\Delta$ 32 Homozygotes in the Human**

**Jurkat CD4<sup>+</sup> Cell Line and Primary CD4<sup>+</sup> Cells**

**by CRISPR-Cas9 Genome-Editing Technology**

**Chunxia Qi, Dan Li, Xiangxiang Jiang, Xiaopeng Jia, Lingling Lu, Yanfeng Wang, Jinhuan Sun, Yiming Shao, and Min Wei**

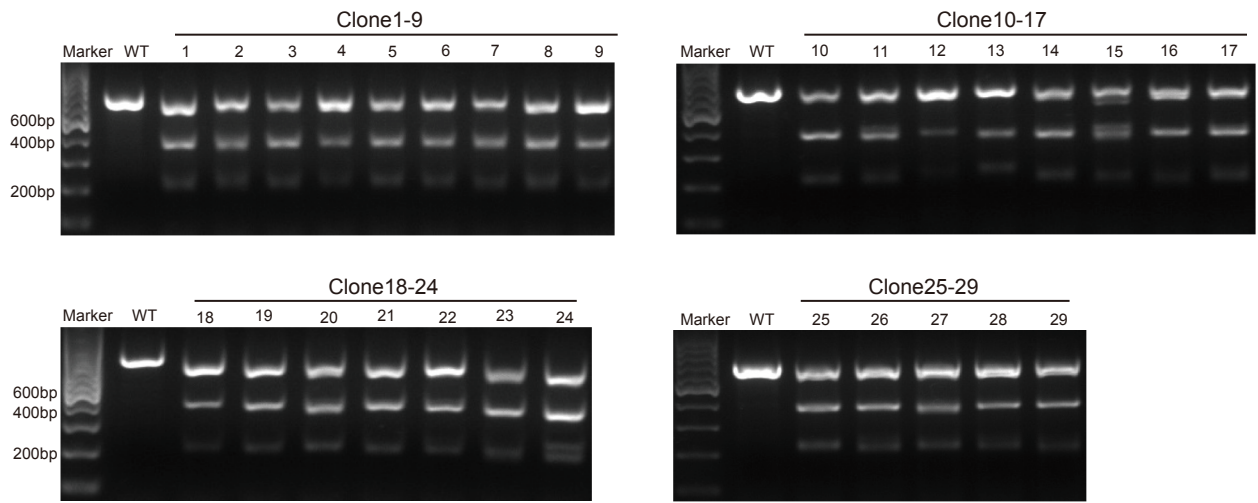

**Figure S1. T7E1 digestion of CCR5 PCR products from CRISPR-Cas9 sgRNA1/2 treated puromycin-resistant monoclonal Jurkat cells.**

**Table S1. sgRNA for this study**

| sgRNA   | Sequence ( 5' to 3' ) |
|---------|-----------------------|
| sgRNA-1 | CAGAAUUGAUACUGACUGUA  |
| sgRNA-2 | AGAUGACUAUCUUJAAUGUC  |

**Table S2. Primers for amplifying CCR5 gene, constructing plamid and qPCR**

| Name              | Forward primer ( 5' to 3' )    | Reverse primer ( 5' to 3' ) | Product size (bp) | Application                                               |
|-------------------|--------------------------------|-----------------------------|-------------------|-----------------------------------------------------------|
| CCR5              | TCTTCTTCATCATCCTCCTG           | GTTTGGCAATGTGCTTTT          | 609               | Amplifying CCR5 gene across the target sites              |
| sgRNA1-2          | TTAAGAATTCGAGGGCCTATTTCCCATGAT | TAGCGAATTCAAAAAAGCACCGAC    | 372               | Constructing lentiCRISPRv2 containing sgRNA-1 and sgRNA-2 |
| real-time-CCR5    | GGAAGAATTTCCAGACA              | CTTCTCATTTTCGACACC          | 116               | Amplifying CCR5 gene for quantitative analysis            |
| real-time-β-actin | CACCTTCTACAATGAGCTGCGTGTG      | ATAGCACAGCCTGGATAGCAACGTAC  | 158               | Amplifying β-actin gene for quantitative analysis         |

**Table S3. Information of 15 potential off-target sites**

| sgRNA   | Order | Chromosome | Strand | Mismatches | Score    | Sequence ( 5' to 3' )   |
|---------|-------|------------|--------|------------|----------|-------------------------|
| sgRNA-1 | 1     | chr13      | 1      | 2          | 3.264103 | TAGAATTGATACTGTCTGTATGG |
|         | 2     | chr8       | -1     | 3          | 2.392593 | TATATTTGATACTGACTGTAAGG |
|         | 3     | chr11      | 1      | 3          | 1.040778 | CACAATTAATACTGACTGCAAAG |
|         | 4     | chr8       | -1     | 4          | 0.7171   | AAAGATTGATAATGACTGTATGG |
|         | 5     | chr12      | -1     | 4          | 0.412429 | CAAAATTCCTACTGACTGTGTGG |
|         | 6     | chr10      | -1     | 3          | 0.195685 | CAGAACTGATTCTGACTTTAGGG |
|         | 7     | chr4       | 1      | 3          | 1.196118 | CAAAATTAATACTGACAGTAAAG |
|         | 8     | chr1       | 1      | 4          | 0.919204 | GCAAATAGATACTGACTGTAGAG |
| sgRNA-2 | 1     | chr3       | -1     | 3          | 0.968125 | AGATGATGTTCTTTAATGTCAAG |
|         | 2     | chr4       | 1      | 3          | 0.929725 | AAATGACTTTTTTTAATGTCCAG |
|         | 3     | chr7       | -1     | 3          | 0.869432 | AGGTGACTCTCTTTAATGTGAGG |
|         | 4     | chr3       | 1      | 3          | 0.854042 | ACATGATTATCTTTAAAGTCAGG |
|         | 5     | chrX       | -1     | 4          | 0.770556 | AGGCCACTATTTTTAATGTCTGG |
|         | 6     | chr1       | -1     | 4          | 0.485165 | AAATTACTTTTTTTAATGTCTGG |
|         | 7     | chr2       | -1     | 4          | 0.328114 | ATATGGATATTTTTAATGTCTGG |

**Table S4. Primers for amplifying 15 potential off-target sites**

| sgRNA   | Order | Forward primer ( 5' to 3' ) | Reverse primer ( 5' to 3' ) | Product size (bp) |
|---------|-------|-----------------------------|-----------------------------|-------------------|
| sgRNA-1 | 1     | TCTCGGTGCTAACTGGAT          | AATAAATGGCCTGGCTTA          | 563               |
|         | 2     | CTATTCGGACAGGTTTAT          | GATGGGAATGATTAGAAG          | 625               |
|         | 3     | CCTATCTCATAATGGGAACT        | TCAGGGACCTTGTCTTTT          | 507               |
|         | 4     | TTCAGAAATCCCTCACAG          | AAACTTCTACCCACTCCC          | 577               |
|         | 5     | ACCAGGAGTGAGACAGAT          | AACGGAGGTCCATTTAGT          | 779               |
|         | 6     | GGTGGCGGAGTGATAAGC          | AGCCTGGGAGGGAAGAGT          | 523               |
|         | 7     | CTCGTCCTTATTTGCTAC          | TCAGTTTGTGGGCTCTTA          | 832               |
|         | 8     | ACAGGGTGGAGTTCTTTC          | TGTTACCAGGGTCGTGAG          | 599               |
| sgRNA-2 | 1     | CACTATCTGATACAGGAGCCA       | CTGGAGGAAGCAAGGTGA          | 644               |
|         | 2     | TCTTCTAAGCCATCCTAT          | CATACCTTCGTGCATAAC          | 582               |
|         | 3     | TTATTAAGGACCTGGGTG          | TCTGCTGGGAATTATGCT          | 640               |
|         | 4     | TCACCACCTTGTCCATAAT         | TGGCACCTAATAAACACT          | 727               |
|         | 5     | AAGATGGTGCTTTGTTGC          | AGAGCCAAGGTTGAGAAT          | 680               |
|         | 6     | CATTCAGAACCTGCCAATA         | TGTTACCTGGAGCCAATC          | 784               |
|         | 7     | CGGTCTGATTCTTAGGT           | CAAGTAGGTTGGCTGTAT          | 551               |

**Table S5. Information of 34 potential off-target sites**

| sgRNA   | Order | Chromosome | Strand | Mismatches | Score                   | Sequence ( 5' to 3' )   |
|---------|-------|------------|--------|------------|-------------------------|-------------------------|
| sgRNA-1 | 1     | chr5       | 1      | 4          | 0.899986                | TAGATTAGAGACTGACTGTACAG |
|         | 2     | chrX       | -1     | 4          | 0.63923                 | CATAATTAACATTGACTGTATAG |
|         | 3     | chr4       | 1      | 4          | 0.638056                | CAGTCTTGAGAGTGACTGTATGG |
|         | 4     | chr3       | -1     | 4          | 0.556119                | GATAAAAGATACTGACTGTATGG |
|         | 5     | chr20      | 1      | 4          | 0.542337                | CTGATTGGATTCTGACTGTAGAG |
|         | 6     | chrY       | 1      | 4          | 0.497494                | CAACTGTTACTGACTGTACAG   |
|         | 7     | chr5       | 1      | 4          | 0.423293                | CAGTATTTTAAATGACTGTATAG |
|         | 8     | chr7       | 1      | 4          | 0.412612                | CAGATATAATAGTGACTGTACAG |
|         | 9     | chr2       | 1      | 4          | 0.409264                | GAGAATTGCAAGTGACTGTAAAG |
|         | 10    | chr17      | -1     | 4          | 0.289109                | CAGTATAGCTAGTGACTGTATAG |
|         | 11    | chr19      | -1     | 4          | 0.28003                 | CAGACCTGGTCCTGACTGTATAG |
| sgRNA-2 | 1     | chr12      | 1      | 3          | 1.517516                | AGAGTACTTTCTTTAATGTCAAG |
|         | 2     | chr4       | -1     | 4          | 1.296863                | AAATTACAACCTTTAATGTCAAG |
|         | 3     | chr7       | -1     | 4          | 0.905329                | ATGTTAATATCTTTAATGTCTAG |
|         | 4     | chr7       | -1     | 4          | 0.904531                | AGAAAAACATCTTTAATGTCTAG |
|         | 5     | chr8       | 1      | 3          | 0.81265                 | AGGTGACTTTCATTAATGTCAAG |
|         | 6     | chr8       | -1     | 4          | 0.807015                | TTATGACAATTTTAAATGTCTAG |
|         | 7     | chr2       | -1     | 4          | 0.784602                | AAATTTCTAGCTTTAATGTCCAG |
|         | 8     | chr2       | -1     | 4          | 0.782934                | AATTAECTATATTTAATGTCCAG |
|         | 9     | chr13      | 1      | 4          | 0.697697                | AGATCACCAAATTTAATGTCAAG |
|         | 10    | chr8       | 1      | 4          | 0.669827                | TAATGACTAACATTAATGTCTAG |
|         | 11    | chr5       | 1      | 4          | 0.578474                | AAATTAATTTCTTTAATGTCTAG |
|         | 12    | chr18      | -1     | 4          | 0.488624                | ATATTAATATCATTAATGTCAAG |
|         | 13    | chr11      | -1     | 4          | 0.480401                | ACATTTCTATGTTAATGTCTAG  |
| 14      | chr21 | 1          | 4      | 0.478373   | ATGTGACTTTTTTAAATGTCTAG |                         |
| 15      | chr5  | -1         | 4      | 0.442449   | AAATGTCTACATTTAATGTCTGG |                         |
| 16      | chr8  | -1         | 4      | 0.423293   | AGAGTACTTTCCTTAATGTCAAG |                         |
| 17      | chr12 | -1         | 4      | 0.254014   | AGATGGCTTGATTTAATGTCTGG |                         |
| 18      | chr9  | 1          | 3      | 0.39575    | AGATGACTCTGGTTAATGTCTAG |                         |
| 19      | chr8  | 1          | 4      | 0.35551    | TGATGTTTTCTTTAATGTCCAG  |                         |
| 20      | chr5  | 1          | 4      | 0.329465   | AGATGTAGTTCTTTAATGTCTAG |                         |
| 21      | chr2  | -1         | 4      | 0.293525   | AAATGGCTTTTTTAAATGTCAAG |                         |
| 22      | chr6  | 1          | 4      | 0.293525   | ACATGTCTTTTTTAAATGTCAAG |                         |
| 23      | chr6  | 1          | 4      | 0.262611   | AGAGGAATATGATTAATGTCCAG |                         |

**Table S6. Distribution of 6 and 4 Indels in the wide-type and sgRNA1/2 group**

| sgRNA   | Target sites |           |                         | Indels |           |           |          |      | Group |          |
|---------|--------------|-----------|-------------------------|--------|-----------|-----------|----------|------|-------|----------|
|         | Chr          | Position  | Sequence ( 5' to 3' )   | Chr    | Position  | Reference | Mutation | Gene | WT    | sgRNA1/2 |
| sgRNA-1 | chr7         | 116721734 | CAGATATAATAGTACTGTACAG  | chr7   | 116721946 | T         | TGAGAGA  | het  | 1     | 1        |
| sgRNA-2 | chr12        | 101090256 | AGAGTACTTTCTTTAATGTCAAG | chr12  | 101090121 | G         | GA       | het  | 1     | 1        |
|         | chr4         | 173334767 | AAATTACAACCTTTAATGTCAAG | chr4   | 173334806 | GT        | G        | hom  | 1     | 1        |
|         | chr2         | 191608841 | AAATGGCTTTTTTTAATGTCAAG | chr2   | 191608793 | A         | ACT      | het  | 1     | 1        |
|         | chr6         | 7818465   | ACATGTCTTTTTTTAATGTCAAG | chr6   | 7818565   | G         | GA       | het  | 1     | 1        |
|         | chr13        | 32346002  | AGATCACCAAATTTAATGTCAAG | chr13  | 32346144  | T         | TAA      | het  | 1     | 1        |
|         |              |           |                         |        | 32345928  | T         | TAA      | het  | 1     | 1        |

The red part indicates the four Indels when the whole genome sequencing were covered by at least 20× repeats in the wide-type and sgRNA1/2 group.

**Table S7. Distribution of 17 SNVs in the wide-type and sgRNA1/2 group**

| sgRNA   | Target sites |                        |                          | SNVs    |           |           |          |      | Group |          |
|---------|--------------|------------------------|--------------------------|---------|-----------|-----------|----------|------|-------|----------|
|         | Chr          | Position               | Sequence ( 5' to 3' )    | Chr     | Position  | Reference | Mutation | Gene | WT    | sgRNA1/2 |
| sgRNA-1 | chr13        | 54263119               | TAGAATTGATACTGTCTGTATGG  | chr13   | 54262910  | G         | T        | het  | 1     | 1        |
|         |              |                        |                          |         | 54263249  | C         | T        | het  | 1     | 1        |
|         | chr8         | 139024558              | TATATTTGATACTGACTGTAAGG  | chr8    | 139024326 | A         | G        | hom  | 1     | 1        |
|         | chr12        | 67433224               | CAAAATTCCTACTGACTGTGTGG  | chr12   | 67433136  | A         | C        | hom  | 1     | 1        |
|         | chr4         | 179505551              | CAAAATTAATACTGACAGTAAAG  | chr4    | 179505530 | G         | C        | hom  | 1     | 1        |
|         | chr17        | 9510334                | CAGTATAGCTAGTACTGTATAG   | chr17   | 9510599   | A         | G        | hom  | 1     | 1        |
| chr19   | 3152159      | CAGACCTGGTCTGACTGTATAG | chr19                    | 3152298 | C         | T         | hom      | 1    | 1     |          |
| sgRNA-2 | chr4         | 27944663               | AAATGACTTTTTTTAATGTCCAG  | chr4    | 27944440  | A         | T        | het  | 1     | 1        |
|         |              |                        |                          |         | 27944883  | T         | A        | hom  | 1     | 1        |
|         | chr12        | 101090256              | AGAGTACTTTCTTTAATGTCAAG  | chr12   | 101090545 | G         | T        | hom  | 1     | 1        |
|         | chr2         | 159448454              | AAATTTCTAGCTTTAATGTCCAG  | chr2    | 159448238 | G         | A        | het  | 1     | 1        |
|         |              |                        |                          |         | 159448306 | G         | C        | het  | 1     | 1        |
|         | chr13        | 32346002               | AGATCACCAAATTTAATGTCAAG  | chr13   | 32345752  | T         | C        | het  | 1     | 1        |
|         | chr5         | 18818030               | AAATTAATTTCTTTAATGTCTAG  | chr5    | 18817870  | A         | G        | het  | 1     | 1        |
|         | chr18        | 41236144               | ATATTAATATCATTAAATGTCAAG | chr18   | 41236042  | G         | A        | hom  | 1     | 1        |
|         |              |                        |                          |         | 41236054  | G         | A        | het  | 1     | 1        |
|         | chr8         | 63481472               | AGAGTACTTTCCTTAATGTCAAG  | chr8    | 63481760  | G         | A        | hom  | 1     | 1        |
|         | chr9         | 132110847              | AGATGACTCTGGTTAATGTCTAG  | chr9    | 132110836 | C         | T        | hom  | 1     | 1        |
|         | chr8         | 3892234                | TGATGTTTTTCTTTAATGTCCAG  | chr8    | 3892017   | C         | A        | het  | 1     | 1        |
|         | chr5         | 72612523               | AGATGTAGTTCTTTAATGTCTAG  | chr5    | 72612727  | A         | G        | hom  | 1     | 1        |
|         | chr2         | 191608841              | AAATGGCTTTTTTTAATGTCAAG  | chr2    | 191608752 | A         | G        | het  | 1     | 1        |
